# Supplementary material for: The Acute COPD Exacerbation Prediction Tool (ACCEPT): development and external validation study of a personalised prediction model
Source: bioRxiv or medRxiv preprint supplement (doi:10.1101/651901), 2019-10-11
Supplement: Supplementary file [file media-1.pdf]

# Supplementary Material: Development and External Validation of the Acute COPD Exacerbation Prediction Tool (ACCEPT)

Amin Adibi, MSc; Don D Sin, MD; Abdollah Safari, PhD; Kate M Johnson, MSc; Shawn D Aaron, MD, J Mark FitzGerald, MD; Mohsen Sadatsafavi, MD, PhD

## Contents

|                                                                                                                       |   |
|-----------------------------------------------------------------------------------------------------------------------|---|
| Appendix I: Mathematical Definition of the Model .....                                                                | 2 |
| Appendix II: Bayesian Recalculation of the Random Effects Distribution to Incorporate Full Exacerbation History ..... | 2 |
| Appendix III: Characteristics of the Development Dataset .....                                                        | 4 |
| Appendix IV: Internal Validation of the Model.....                                                                    | 6 |
| References .....                                                                                                      | 8 |

## Appendix I: Mathematical Definition of the Model

To quantify incidence and severity of COPD exacerbations and their correlation, we used a parametric joint recurrent-event and logistic regression model similar to the one published previously by our group.<sup>1</sup>

The model consists of two components: a rate components that models the occurrence of exacerbations, and a severity component that models the severity of exacerbations when they occur.

### The rate component

The rate component was a random-intercept accelerated failure time (AFT) model. Unlike proportional hazard models, AFT models fully specify the likelihood function and as such can be used for prediction of event rates in a new subject. All exacerbations that could occur during follow-up time were considered, with time from baseline to each exacerbation (or censoring) being the unit of analysis. AFT models incorporate the effect of covariates on time-to-events by accelerating or decelerating the passage of time. In such models, the hazard ( $h$ ) of event (exacerbation) at time  $t$  as function of the set of covariates ( $X$ ) is

$$h(t) = \theta(X) \cdot h_0(t, \theta(X))$$

Where

$$\theta(X) = \exp(z_1 + \beta_1 \cdot X_1 + \beta_2 \cdot X_2 + \dots).$$

The  $\beta$  vector captures the effect of covariates. Between-individual variability (heterogeneity) was modelled through the random-effect term  $z_1$ . It also captures within-individual correlation in time to exacerbations.

AFT models require the specification of a baseline hazard ( $h_0$ ). We examined different functions. The function that provided the best fit for the development dataset was Weibull.

### The severity component

The severity component was a random-intercept logistic regression (binomial distribution with a logit link function). The outcome was severity of each exacerbation, coded as 1 when the exacerbation was severe, and 0 otherwise.

$$\text{logit}(P(\text{severity})) = \exp(z_2 + \beta'_1 \cdot X_1 + \beta'_2 \cdot X_2 + \dots)$$

Here  $\beta'$  is the vector of coefficients for the severity component, and  $z_2$  is the random-effect terms that models individualized risk of an exacerbation being severe, over and beyond the effect of covariates. It also captures within-individual correlation between severity of exacerbations. Individuals contributed to the severity component if they had at least one exacerbation during their follow-up.

The two random-effect terms,  $z_1$  and  $z_2$ , were modelled to have a joint bivariate normal distribution. Any correlation between the rate and severity component (e.g., if frequent exacerbaters have higher proportion of severe to total exacerbations) would be captured in the correlation between  $z_1$  and  $z_2$ , resulting in accurate modelling of dependencies between the two components.

For each individual, this model would generate a predicted time-dependent hazard function for exacerbation, and a predicted risk of an exacerbation being severe. The two quantities can be used to produce a variety of predictions including the number of exacerbations during follow-up, the probability of experiencing any number of exacerbations, the number of severe exacerbations during follow-up, the probability of experiencing any number of severe exacerbations, and so on. The model was coded in PROC NLMIXED in SAS. We used the likelihood-based empirical covariance matrix estimator (otherwise known as the robust or the “sandwich” estimator). SAS code for model fitting is publicly available at <https://github.com/resplab/accept-codes>.

## Appendix II: Bayesian Recalculation of the Random Effects Distribution to Incorporate Full Exacerbation History

The joint distribution of random effects for rate and severity of exacerbations were recalculated by giving each pair of random effects the appropriate weight given the observed number of all and severe exacerbations within the past year. We used an iterative process to recalculate random effect distributions. Briefly, let  $N_1$  be the number of total exacerbations, and let  $N_2$  be the number of severe exacerbations, in the previous year. Let  $z_1$  and  $z_2$  be two random-effect terms (with bivariate normal distribution). Their joint distribution,  $P(z_1, z_2)$ , is estimated in the main model. As well, assuming that the rate of exacerbation does not change between within two consecutive years, the probability of observing a given number of total and severe exacerbations,  $P(N_1, N_2 | z_1, z_2)$ , is the main

outcome of the model. Applying the Bayes rule. We can calculate the updated distribution of random-effects given a certain exacerbation history:

$$P(z_1, z_2 | N_1, N_2) \propto P(N_1, N_2 | z_1, z_2) \cdot P(z_1, z_2)$$

A Monte Carlo simulation with a sample size of 10,000 is used to implement this calculation: first, bivariate random-number generator in R is used to generate a random sample (N=20,000) of  $z_1$  and  $z_2$ . Then the above calculation is performed to assign a weight to each set of  $(z_1, z_2)$  given observed exacerbation history. The weighted  $(z_1, z_2)$  is then used to estimate the distribution of total and severe exacerbations in the next 12 months.

The R code for Bayesian recalculation of random effects distribution is available at ACCEPT's homepage at [http://resp.core.ubc.ca/research/Specific\\_Projects/accept](http://resp.core.ubc.ca/research/Specific_Projects/accept).

### Appendix III: Characteristics of the Development Dataset

Table S1 shows the distribution of baseline characteristics among the three trials used to create the development dataset is shown in. Table S2 shows the distribution of missing variables in the development dataset.

**Table S1 Baseline characteristics and follow-up statistics in MACRO, STATCOPE, and OPTIMAL <sup>a</sup>.**

| Variables                            | MACRO Study (n=1107)                                                                |                                  | STATCOPE Study (n=847)                                                              |                     | OPTIMAL Study (n=426)                                                                 |                     |
|--------------------------------------|-------------------------------------------------------------------------------------|----------------------------------|-------------------------------------------------------------------------------------|---------------------|---------------------------------------------------------------------------------------|---------------------|
|                                      | Distribution                                                                        | No. (%)                          | Distribution                                                                        | No. (%)             | Distribution                                                                          | No. (%)             |
| Male Sex                             | 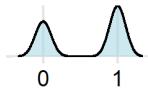   | 654 (59%)                        |    | 478 (56%)           |    | 237 (57%)           |
| Current Smokers                      |    | 244 (22%)                        |    | 256 (30%)           |    | 113 (27%)           |
| O <sub>2</sub> therapy previous year |    | 655 (59%)                        |    | 408 (41%)           |    | 51 (12%)            |
|                                      | <i>Distribution</i>                                                                 | <i>Mean (SD)</i>                 | <i>Distribution</i>                                                                 | <i>Mean (SD)</i>    | <i>Distribution</i>                                                                   | <i>Mean (SD)</i>    |
| Age, years                           |    | 65.18 (8.62)                     |    | 62.39 (8.41)        |    | 67.89 (8.59)        |
| Follow-up time, years                |   | 0.93 (0.18)                      |   | 0.87 (0.25)         |   | 0.89 (0.27)         |
| FEV <sub>1</sub> , % predicted       |  | 39.55 (15.56)                    |  | 41.53 (17.65)       |  | 41.48 (12.86)       |
| SGRQ Score <sup>b</sup>              |  | 50.55 (16.4)                     |  | 49.6 (16.8)         |  | 49.1 (17.4)         |
| BMI                                  |  | 26.77 (6.2)                      |  | 27.2 (6.9)          |  | 27.5 (6.0)          |
| <b>Exacerbations</b>                 | <b>Frequency</b>                                                                    | <b>Count (Rate <sup>c</sup>)</b> | <b>Frequency</b>                                                                    | <b>Count (Rate)</b> | <b>Frequency</b>                                                                      | <b>Count (Rate)</b> |
| All                                  |  | 1597 (1.55)                      |  | 850 (1.15)          |  | 596 (1.43)          |
| Severe <sup>d</sup>                  |  | 347 (0.34)                       |  | 168 (0.23)          |  | 112 (0.27)          |
|                                      | <i>Distribution</i>                                                                 | <i>No. (%)</i>                   | <i>Distribution</i>                                                                 | <i>No. (%)</i>      | <i>Distribution</i>                                                                   | <i>No. (%)</i>      |
| Indicated Statin                     |  | 446 (40%)                        |  | 0 (0%)              |  | 91 (22%)            |

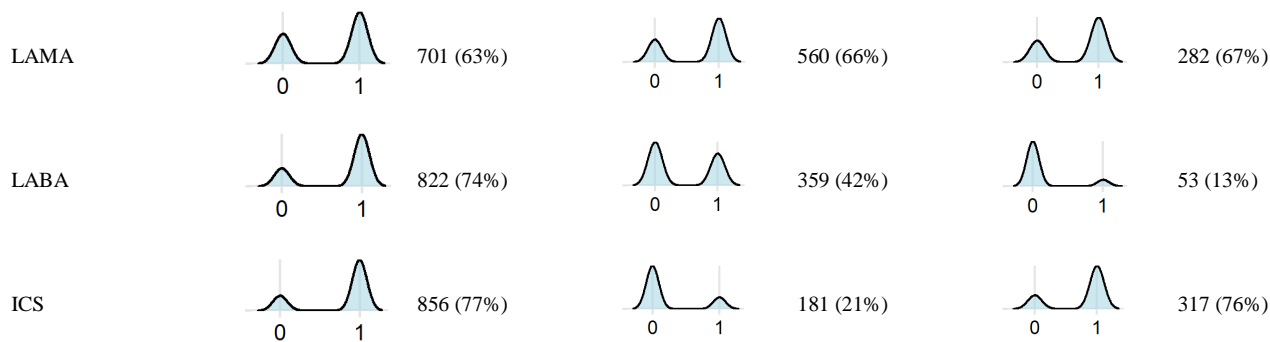

Abbreviations: COPD, chronic obstructive pulmonary disease; FEV1, forced expiratory volume in 1 second; SD, standard deviation; SGRQ, St. George's Respiratory Questionnaire; LAMA, long acting muscarinic antagonist; LABA, long acting beta antagonist; ICS, inhaled corticosteroids; BMI, body mass index.

<sup>a</sup> Data are presented as mean (SD) for continuous variables and number of subjects (% of column total) for dichotomous variables, except where noted.

<sup>b</sup> Between 0 and 100, with a higher score indicating worse status.

<sup>c</sup> The annual rate of exacerbations (episodes/patient year).

**Table S2 Missing data in the development dataset**

|                                      | MACRO<br>(1117 Patients) | OPTIMAL<br>(449 Patients) | STATCOPE<br>(877 Patients) | Total<br>(2443 Patients) |
|--------------------------------------|--------------------------|---------------------------|----------------------------|--------------------------|
| <b>Complete Cases</b>                | <i>1107 (99.10%)</i>     | <i>426 (94.88%)</i>       | <i>847 (96.58%)</i>        | <i>2380 (97.42%)</i>     |
| <b>Variable</b>                      | <i>Missing N(%)</i>      | <i>Missing N(%)</i>       | <i>Missing N(%)</i>        | <i>Missing N(%)</i>      |
| Male                                 | 0                        | 0                         | 0                          | 0                        |
| Age, years                           | 0                        | 7 (1.56%)                 | 0                          | 7 (0.29%)                |
| Current Smokers                      | 1 (0.09%)                | 0                         | 0                          | 1 (0.04%)                |
| O <sub>2</sub> therapy previous year | 0                        | 9 (2.00%)                 | 0                          | 9 (0.37%)                |
| FEV <sub>1</sub> , % predicted       | 3 (0.27%)                | 1 (0.24%)                 | 6 (0.68%)                  | 10 (0.41%)               |
| SGRQ Score <sup>b</sup>              | 6 (0.54%)                | 4 (0.89%)                 | 24 (2.73%)                 | 34 (1.39%)               |
| BMI                                  | 0                        | 2 (0.45%)                 | 1 (0.11%)                  | 3 (0.12%)                |
| On statins                           | 0                        | 0                         | 0                          | 0                        |
| On LAMA                              | 0                        | 0                         | 0                          | 0                        |
| On LABA                              | 0                        | 0                         | 0                          | 0                        |
| On ICS                               | 0                        | 0                         | 0                          | 0                        |

Abbreviations: COPD, chronic obstructive pulmonary disease; FEV1, % predicted forced expiratory volume in 1 second using Hankinson's method; SGRQ, St. George's Respiratory Questionnaire; ; LAMA, long acting muscarinic antagonist; LABA, long acting beta antagonist; ICS, inhaled corticosteroids; BMI, body mass index.

**Table S3 Missing data in the validation dataset**

|                                      | ECLIPSE<br>(1928 Patients) |
|--------------------------------------|----------------------------|
| <b>Complete Cases</b>                | <i>1819 (94.35%)</i>       |
| <b>Variable</b>                      | <i>Missing N(%)</i>        |
| Male                                 | 0                          |
| Age, years                           | 0                          |
| Current Smokers                      | 16 (0.83%)                 |
| O <sub>2</sub> therapy previous year | 0                          |
| FEV <sub>1</sub> , % predicted       | 15 (0.78%)                 |
| SGRQ Score <sup>b</sup>              | 83 (4.30%)                 |
| BMI                                  | 5 (0.26%)                  |
| On statins                           | 0                          |
| On LAMA                              | 0                          |
| On LABA                              | 0                          |
| On ICS                               | 0                          |

Distribution of missing values is shown for all COPD patients in ECLIPSE, irrespective of exacerbation history.

Abbreviations: COPD, chronic obstructive pulmonary disease; FEV1, % predicted forced expiratory volume in 1 second using Hankinson's method; SGRQ, St. George's Respiratory Questionnaire; ; LAMA, long acting muscarinic antagonist; LABA, long acting beta antagonist; ICS, inhaled corticosteroids; BMI, body mass index.

## Appendix IV: Internal Validation of the Model

The reader can refer to the original publication for a full description of the statistical methodology.<sup>1</sup> The accelerated failure time model requires specification of parametric baseline hazard. We tested exponential, Weibull, log-logistic, and log-normal distributions for the survival function and assessed the internal validity of the resulting models by comparing observed and predicted cumulative number of exacerbations, as well as goodness-of-fit measures of Akaike information criterion (AIC) and Bayesian information criterion (BIC). We selected a Weibull distribution for the survival function because it had the highest agreement between observed and predicted cumulative number of exacerbations (**Figure S1**) and best goodness-of-fit statistics (**Table S3**).

**Table S4** shows calibration in commonly-reported subgroups of sex and smoking status for internal validation. Additionally, the Brier score was 0.21 for all exacerbations and 0.13 for severe exacerbations in the development dataset.

**Table S3 Fit statistics for different survival function models).**

| Survival Function Distribution | AIC           | BIC           |
|--------------------------------|---------------|---------------|
| <b>Weibull Model</b>           | <b>6764.0</b> | <b>6995.0</b> |
| Exponential Model              | 6767.1        | 6991.6        |
| Log-Logistics Model            | 6821.0        | 7122.0        |
| Log-Normal Mode                | 6918.9        | 7219.9        |

Abbreviations: AIC, Akaike information criterion; BIC: Bayesian information criterion.

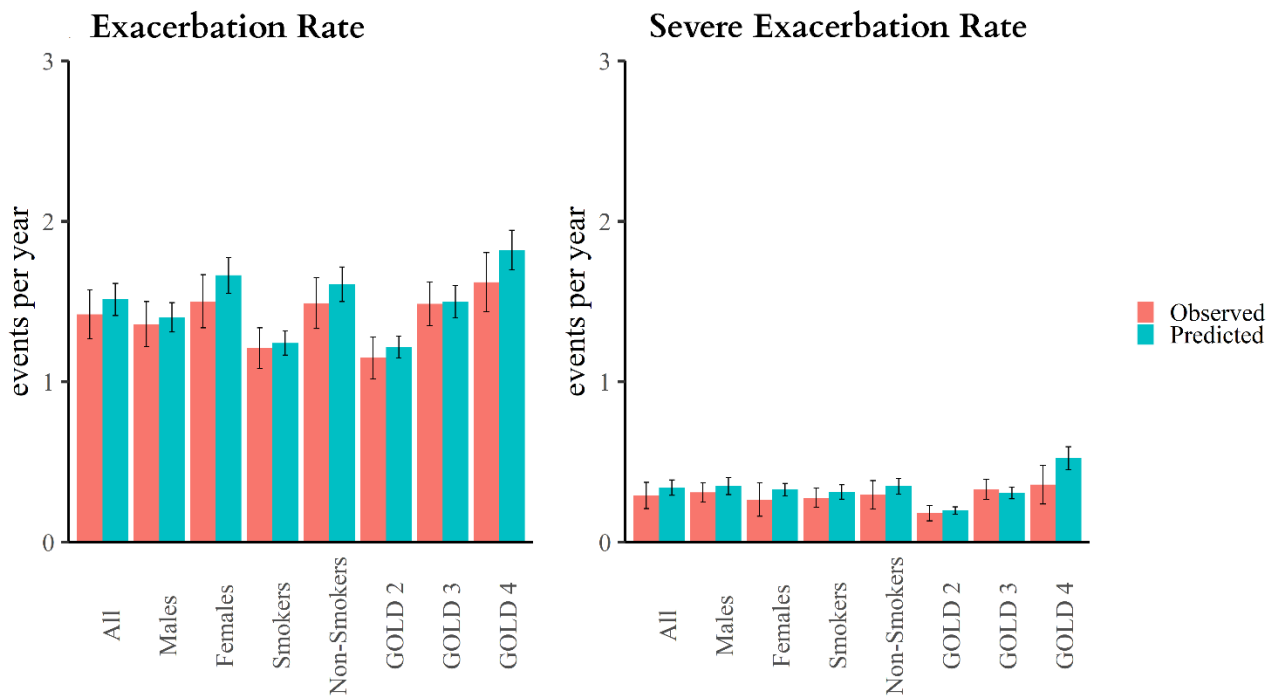

**Figure S1 Calibration of exacerbation and severe exacerbation rate in subgroups of development dataset**

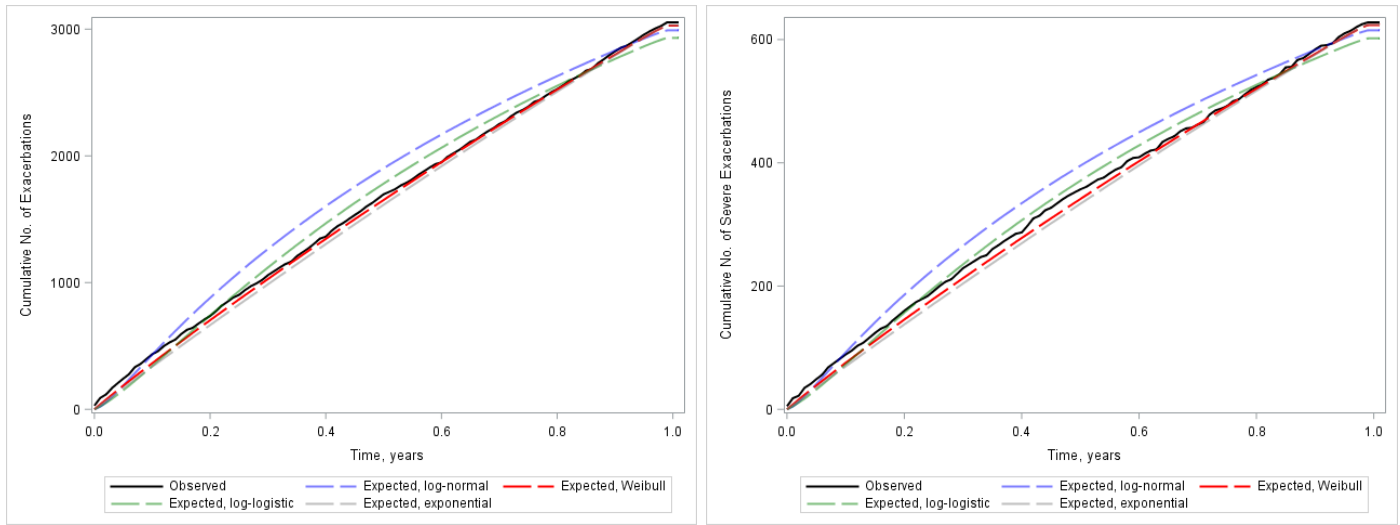

**Figure S2 Internal Validation: Observed and predicted cumulative number of all and severe exacerbations**

## References:

- 1 Sadatsafavi M, Sin DD, Zafari Z, *et al.* The Association Between Rate and Severity of Exacerbations in Chronic Obstructive Pulmonary Disease: An Application of a Joint Frailty-Logistic Model. *Am J Epidemiol* 2016; **184**: 681–9.
